# Supplementary material for: Phosphorylation of collagen fibrils enhances intrafibrillar mineralization and dentin remineralization
Source: Royal Society of Chemistry journal article supplement (doi:10.1039/d4nr00652f), 2024-01-01
Supplement: d4nr00652f1.pdf [file d4nr00652f1.pdf]

## **Supporting Information For**

### **Phosphorylation of collagen fibrils enhances intrafibrillar mineralization and dentin remineralization**

*Bo Zheng,<sup>#</sup> Luyi Zhao,<sup>#</sup> Lelu Chen, Haiyan Lai, Chengze Wang, Yi Chen,  
Changyu Shao,<sup>\*</sup> Ruikang Tang,<sup>\*</sup> and Xinhua Gu<sup>\*</sup>*

## Supported Figures

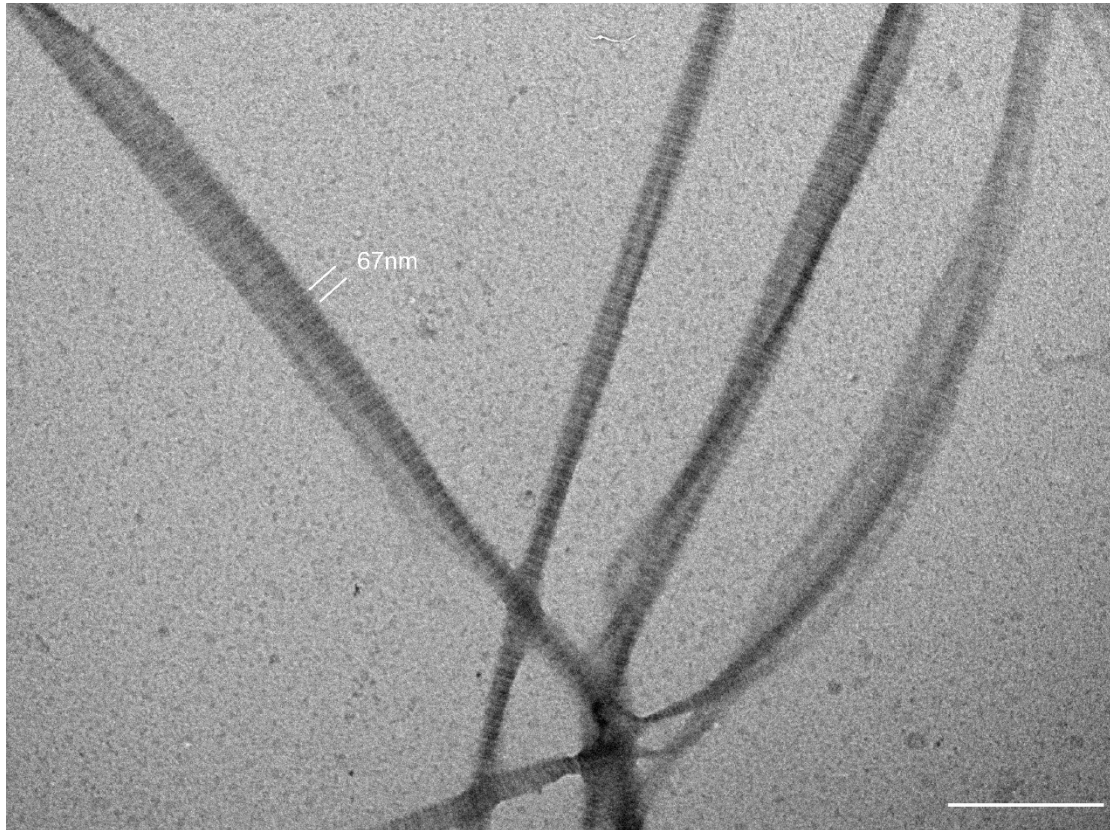

**Figure S1.** TEM images of self-assembled collagen fibrils with a typical 67 nm D-band structure. Scale bar: 500 nm.

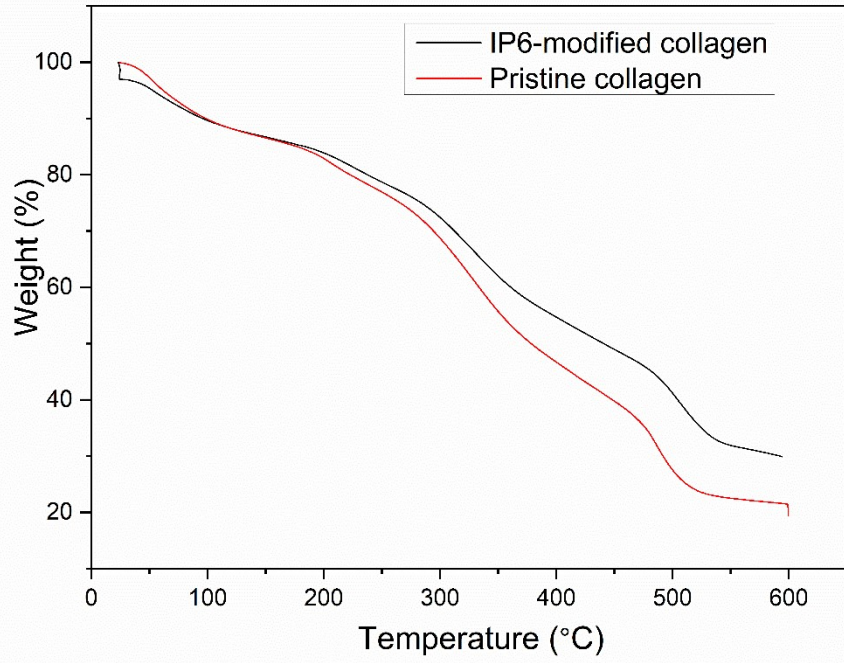

**Figure S2.** The representative curves of the TGA of pristine collagen and IP6-modified collagen after 4-day mineralization.

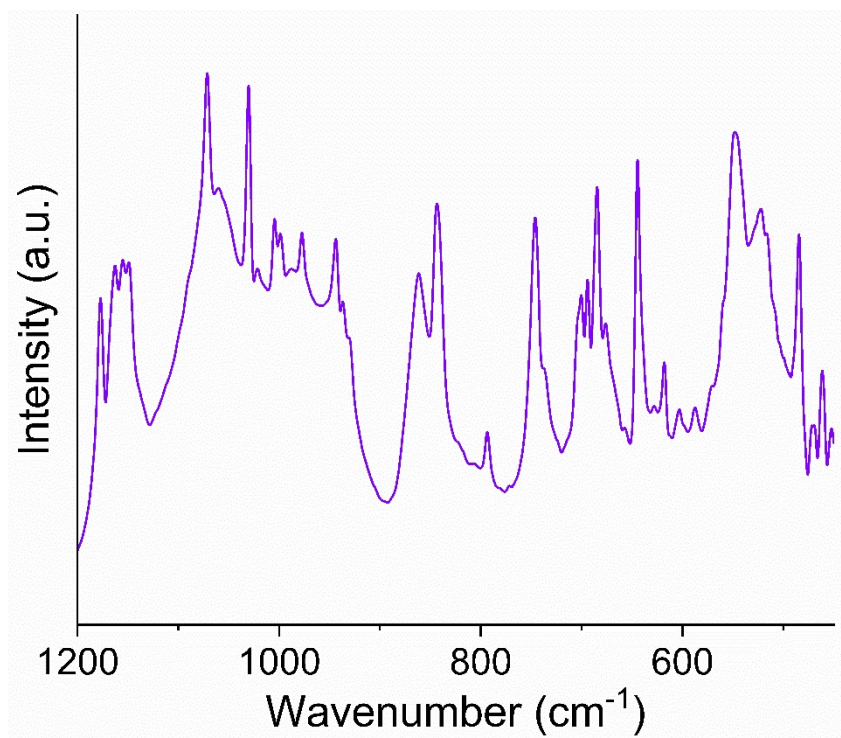

**Figure S3.** FTIR spectrum of IP6.

## Supported Text

### 1. Calculation of interaction energy between IP6 and collagen fibrils

The fitted adsorption curves of IP6 on collagen fibrils follow the Langmuir model (refer to Figure 2b), and the Langmuir isotherm has the following form is commonly used to describe adsorption data at equilibrium (Equation 1).<sup>[S1]</sup>

$$q_e = \frac{q_{max}K_L C_e}{1 + K_L C_e} \quad (1)$$

In which  $q_e$  and  $q_{max}$  are the the adsorption capacity of adsorbent at equilibrium (milligrams per gram) and its maximum value,  $C_e$  is the equilibrium concentration of adsorbate in solution (moles per liter), whereas  $K_L$  is the Langmuir equilibrium constant of adsorption with units of liters per mole.

According to the fitted curve in Figure 2, the equation 1 could be expressed as

$$q_e = \frac{34.92 * 60.93 * C_e}{1 + 60.93 * C_e}$$

and thus, the  $q_{max}$  and  $K_L$  can be calculated and their values are 34.92 mg/g and 60.93 L/mol, respectively.

Additionally, according to the thermodynamic law, the Gibbs energy change ( $\Delta G$ ) of adsorption is calculated as follows

$$\Delta G = -RT \ln K_L \quad (2)$$

where T is the absolute temperature in Kelvin, and R is the gas constant with a value of  $8.314 \text{ J} \cdot \text{mol}^{-1} \cdot \text{K}^{-1}$ . Therefore, the  $\Delta G$  can be calculated and the value is approximately 10.21 kJ/mol, which is the interaction energy between IP6 and collagen fibrils.

## References

- [1] Liu, Y. Is the Free Energy Change of Adsorption Correctly Calculated? *J. Chem. Eng. Data* **2009**, 54 (7), 1981-1985.
